# Supplementary material for: Oxytocin-induced increase in N,N-dimethylglycine and time course of changes in oxytocin efficacy for autism social core symptoms
Source: PubMed Central journal article supplement (PMC7903697; doi:10.1186/s13229-021-00423-z), 2021-02-23

Number of detected cases

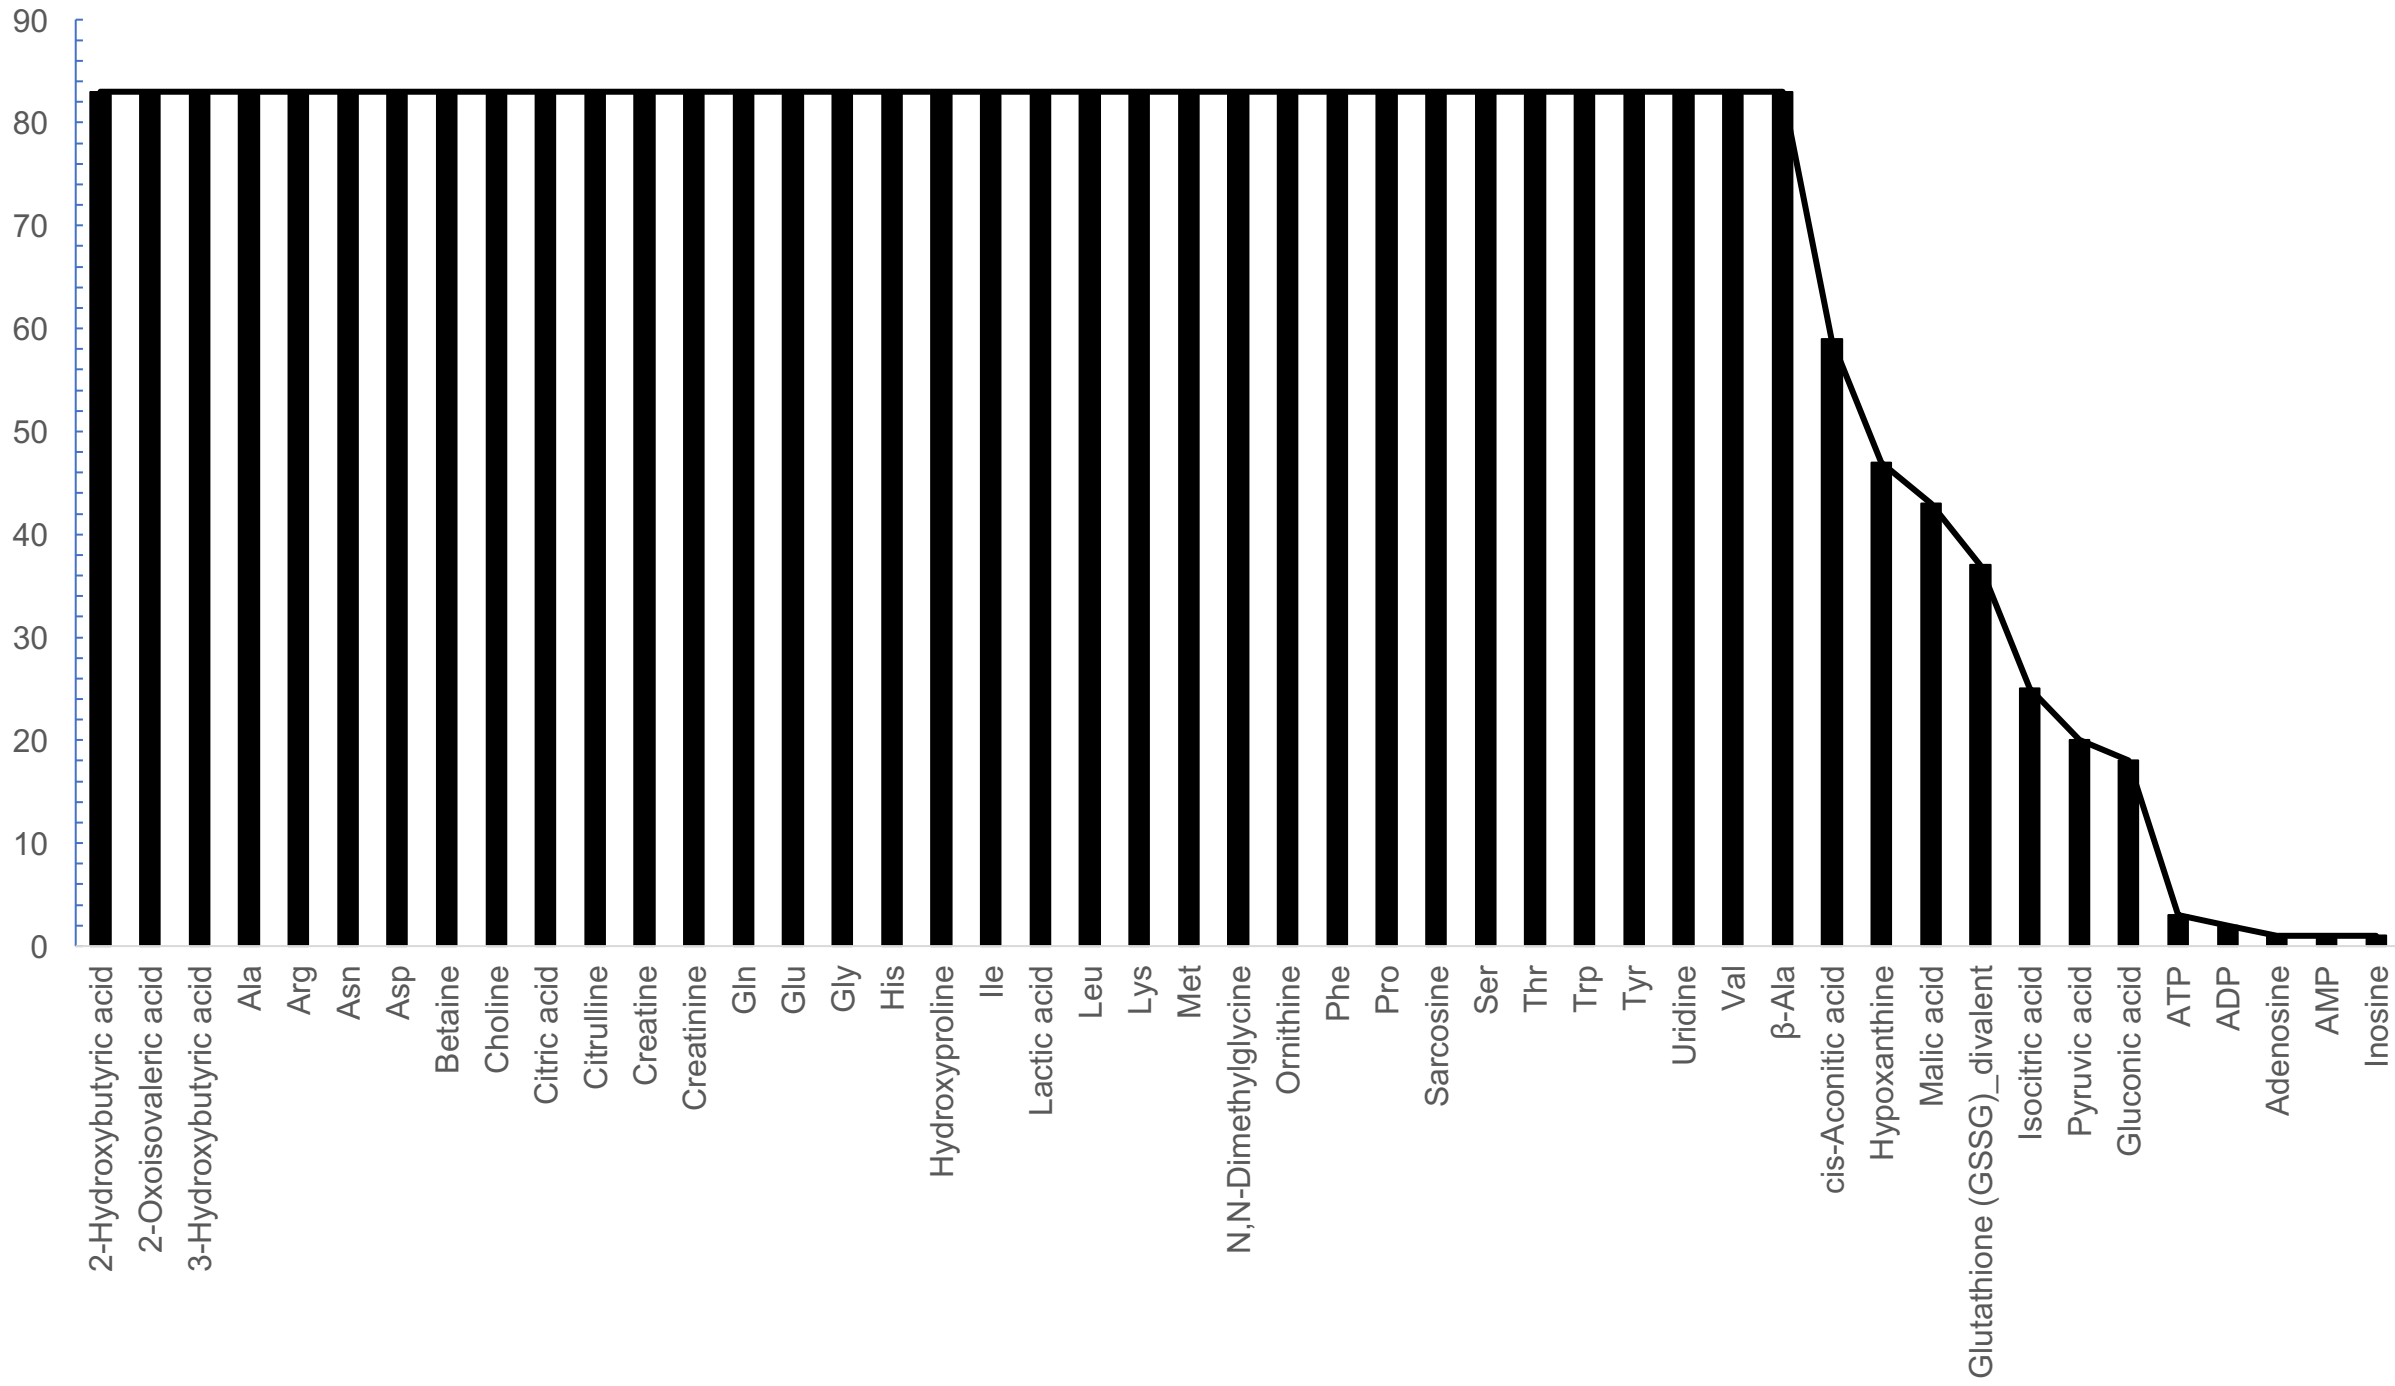

Supplement: 13229_2021_423_MOESM2_ESM.pdf [file 13229_2021_423_MOESM2_ESM.pdf]
